# Supplementary material
Source: PubMed Central journal article supplement (PMC1618913)
Supplement: rsbl20050420s14.pdf [file rsbl20050420s14.pdf]

Supplementary material for:

**Occurrence and recent long-distance dispersal of deep-sea hydrothermal vent shrimps**

by G. Tokuda, A. Yamada, K. Nakano, N. Arita and H. Yamasaki

Figure S1

Unrooted neighbour-joining phylogenetic tree of the crustacean decapods inferred from 18S rDNA sequences. The infraorder and common names are shown beside the tree. Numbers of each node represent bootstrap percentage values from neighbour-joining and maximum parsimony analyses, respectively. The bootstrap percentages less than 50% are not shown. Bar indicates 0.02 substitutions per site.

Figure S2

Multiple alignment of 870 bp nucleotide sequences of 18S rDNA among caridean shrimps. At least 15 indels are observed among the aligned sequences within caridean sequences and 817 unambiguously aligned positions with the corresponding sequences of other decapods were used for phylogenetic analyses.

Figure S3

Multiple alignment of 590 bp *COI* nucleotide sequences among *Alvinocaris* sp. of Sagami Bay, *A. longirostris* of the Hatoma Knoll haplotype 1 and 2 and *A. lusca* that has been reported from Galapagos Rift. *A. longirostris* *COI* haplotype 1 shows the identical nucleotide sequence to that of Sagami Bay, while the haplotype 2 reveals only two

nucleotide substitutions. On the other hand, both the haplotype 1 of *A. longirostris* and that of Sagami Bay revealed 4.9% differences (34 nucleotide substitutions) to the most closely related *A. lusca* (see figure 1b). For number of nucleotide substitutions or informative sites within the *COI* sequences of Bresiliidae, please refer to Shank *et al.* (1999).

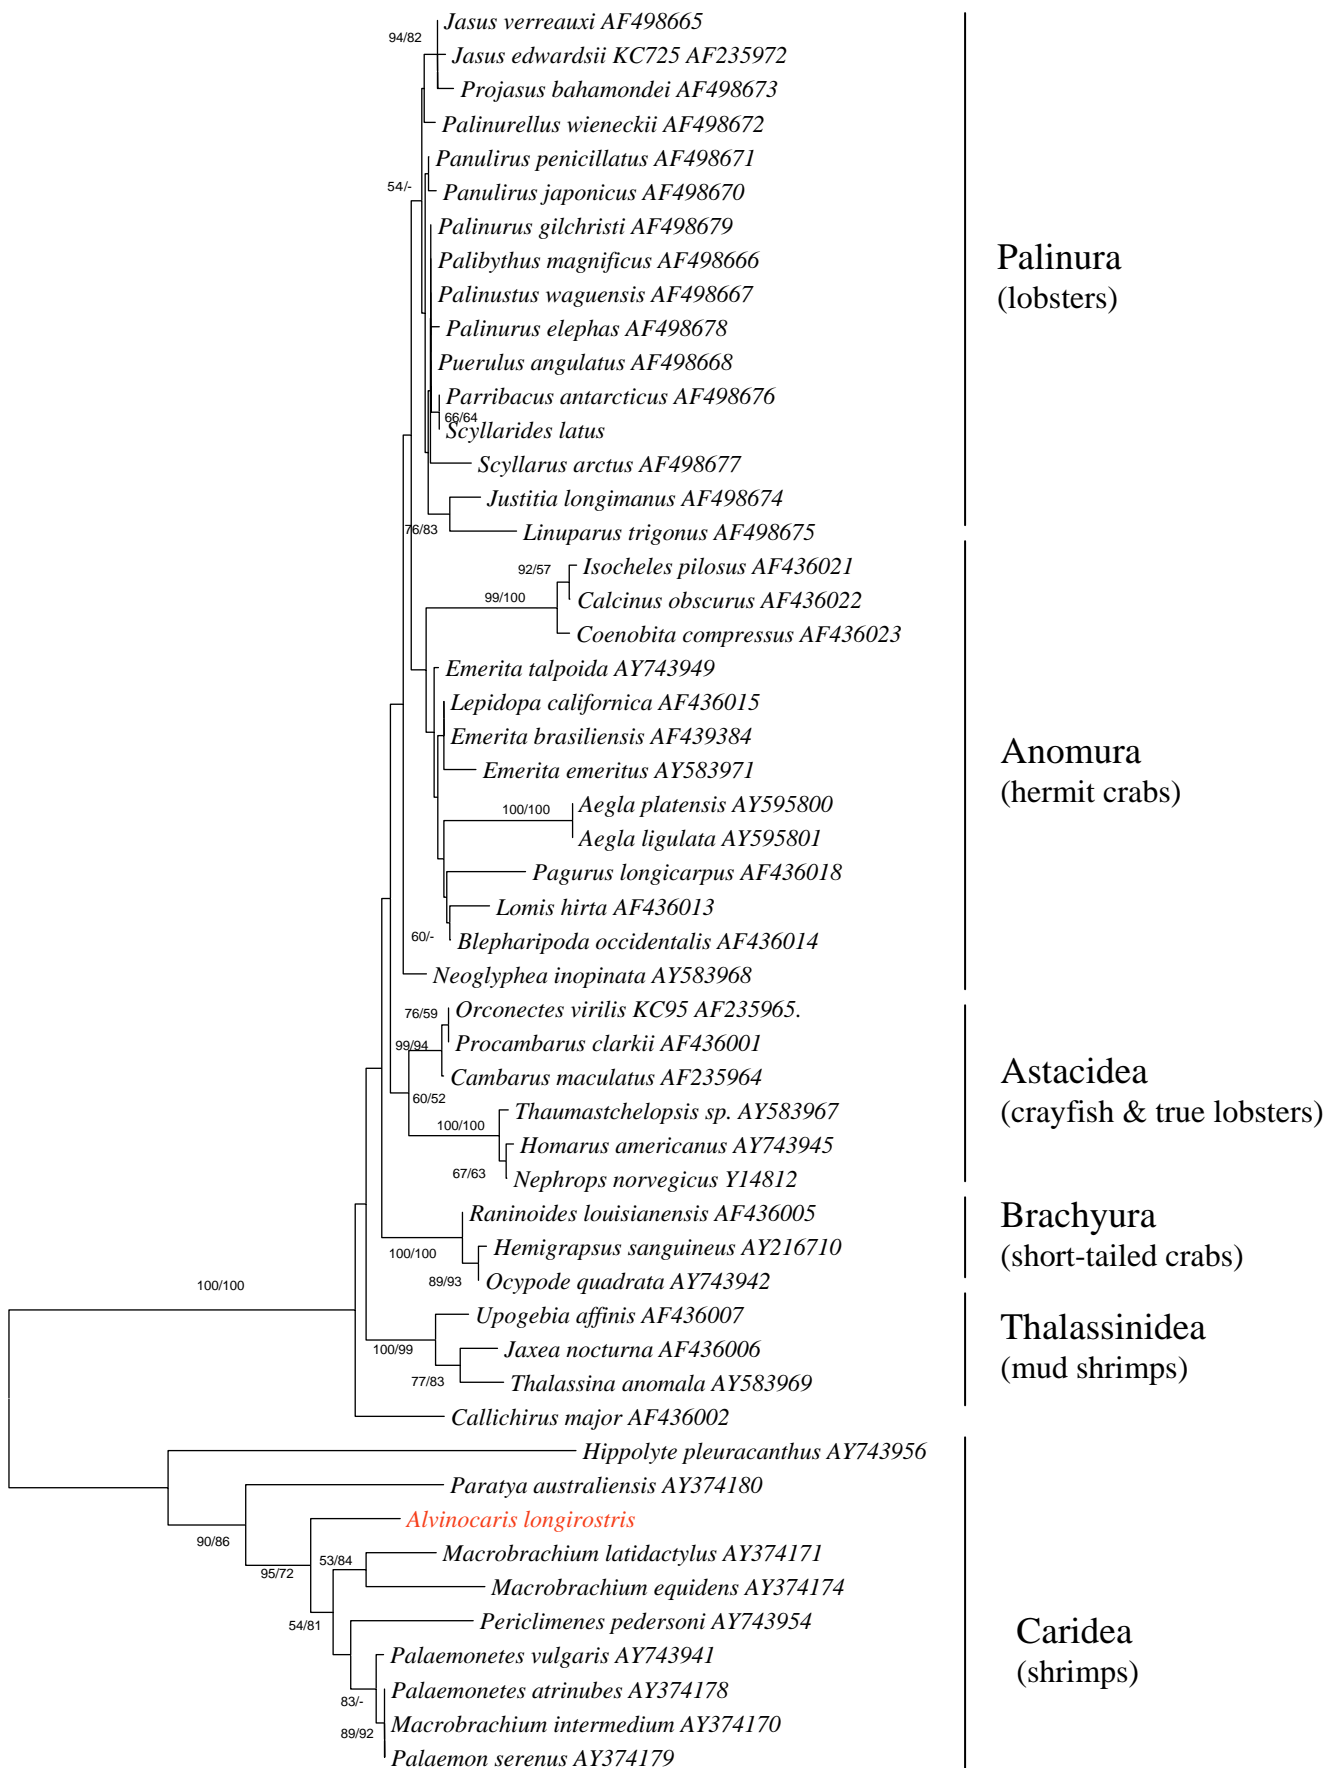

Figure S1



\*\*\*\*\*  
Haplotype2 TAGTTGGAAC TGCCCTTAGTCTCCTCATTGAGCAGAACTGGGCCAACAGGAAGACTTATTGGAAATGACCAAATTTACAATGTTATTGTCACCGCCCA  
Haplotype1 TAGTTGGAAC TGCCCTTAGTCTCCTCATTGAGCAGAACTGGGCCAACAGGAAGACTTATTGGAAATGACCAAATTTACAATGTTATTGTCACCGCCCA  
Sagami-Bay TAGTTGGAAC TGCCCTTAGTCTCCTCATTGAGCAGAACTGGGCCAACAGGAAGACTTATTGGAAATGACCAAATTTACAATGTTATTGTCACCGCCCA  
A.lusca TAGTTGGGACTGCCCTTAGTCTCCTCATTGAGCAGAACTAGGTCAACCAGGAAGACTTATTGGAAATGACCAAATTTACAATGTTATTGTTACCTGCCA

\*\*\*\*\*  
Haplotype2 TGCCTTTGTCATAAATTTCTTTATAGTTATACCTATTATAATAGGTGGATTTGGAAATGACTACTTCCCTTATACTTGGTGCCCCAGATATAGCCTTC  
Haplotype1 TGCCTTTGTCATAAATTTCTTTATAGTTATACCTATTATAATAGGTGGATTTGGAAATGACTACTTCCCTTATACTTGGTGCCCCAGATATAGCCTTC  
Sagami-Bay TGCCTTTGTCATAAATTTCTTTATAGTTATACCTATTATAATAGGTGGATTTGGAAATGACTACTTCCCTTATACTTGGTGCCCCAGATATAGCCTTC  
A.lusca TGCCTTTGTCATAAATTTCTTTATAGTATACCTATTATAATAGGTGGATTTGGAAATGACTACTTCCCTTATACTGGGTGCCCCAGATATAGCCTTT

\*\*\*\*\*  
Haplotype2 CCCCGAATAAATAACATAAGATTCTGGCTTCTCCCTCCCTCTCTCACCCTTCTACTCTCCAGAGGAATAGTAGAAAGGGGGGTGGGCAGGATGAAC TG  
Haplotype1 CCCCGAATAAATAACATAAGATTCTGGCTTCTCCCTCCCTCTCTCACCCTTCTACTCTCCAGAGGAATAGTAGAAAGGGGGGTGGGCAGGATGAAC TG  
Sagami-Bay CCCCGAATAAATAACATAAGATTCTGGCTTCTCCCTCCCTCTCTCACCCTTCTACTCTCCAGAGGAATAGTAGAAAGGGGGGTGGGCAGGATGAAC TG  
A.lusca CCCCGAATAAATAACATAAGATTCTGACTCCTCCCCCTCCCTCAGCCTTCTACTCTCCAGAGGAATAGTAGAAAGGGGGGTGGGCAGGATGAAC TG

\*\*\*\*\*  
Haplotype2 TTTATCCACCGCTAGCAGCAGGAATTGCCACGCTGGAGCATCTGTTGACATAGCAATTTTTTCACTCCACCTTGCAGGAGTATCTTCAATCCTCGGTGC  
Haplotype1 TTTATCCACCGCTAGCAGCAGGAATTGCCACGCTGGAGCATCTGTTGACATAGCAATTTTTTCACTCCACCTTGCAGGAGTATCTTCAATCCTCGGTGC  
Sagami-Bay TTTATCCACCGCTAGCAGCAGGAATTGCCACGCTGGAGCATCTGTTGACATAGCAATTTTTTCACTCCACCTTGCAGGAGTATCTTCAATCCTCGGTGC  
A.lusca TTTATCCGCCCCTAGCAGCGGGAATTGCTCAGCCGGAGCATCTGTTGACATAGCAATTTTTTTCGCTCCACCTTGCAGGAGTATCTTCAATCCTCGGTGC

\*\*\*\*\*  
Haplotype2 CGTCAATTTTATAACTACATGCATTAACATGCGAACAAAGAGGGATAACGATAGATCGTATGCCCTTTTTGTGTGATCAATTTTTTTAACGGCTATCCTA  
Haplotype1 CGTCAATTTTATAACTACATGCATTAACATGCGAACAAAGAGGGATAACGATAGATCGTATGCCCTTTTTGTGTGATCAATTTTTTTAACGGCTATCCTA  
Sagami-Bay CGTCAATTTTATAACTACATGCATTAACATGCGAACAAAGAGGGATAACGATAGATCGTATGCCCTTTTTGTGTGATCAATTTTTTTAACGGCTATCCTA  
A.lusca CGTCAATTTTATAACCACATGCATTAATATGCGAACAAAGAGGGATAACGATAGATCGTATGCCCTTTTTGTGTGGTCAATTTTTTTAACGGCTATCCTA

\*\*\*\*\*  
Haplotype2 CTCCCTCTCTCACTCCCAGTTTTAGCAGGAGCTATTACCATACTACTAACAGATCGTAACCTTAATACTTCAATCTTTGACCCCTGCCGGGGGAGGGG  
Haplotype1 CTCCCTCTCTCACTCCCAGTTTTAGCAGGAGCTATTACCATACTACTAACAGATCGTAACCTTAATACTTCAATCTTTGACCCCTGCCGGGGGAGGGG  
Sagami-Bay CTCCCTCTCTCACTCCCAGTTTTAGCAGGAGCTATTACCATACTACTAACAGATCGTAACCTTAATACTTCAATCTTTGACCCCTGCCGGGGGAGGGG  
A.lusca CTCCCTCTCTCCCTCCCAGTTTTAGCAGGAGCTATTACCATACTACTAACAGATCGTAACCTTAATACTTCAATCTTTGACCCCTGCCGGGGGAGGGG

Figure S3
